# Supplementary material
Source: publisher site journal article supplement (https://www.dovepress.com/get_supplementary_file.php?f=220716.xlsx)
Supplement: Supplementary file 1 [file get_supplementary_file.php]

## Sheet: Table S1
Table S1: Estimated sleep quality assessment metrics with PSG.
ID	TST	SOL	WASO	SE	NA
25L9GD	367	5	217	61.84	34
25M7GD	492	23	74	82.81	30
25M9GD	537	14	40	90.25	42
25N4GD	527	10	53	88.57	33
25P4GD	499	14	77	83.78	42
25P7HD	424	5	71	83.96	27
25R2HD	382	12	107	75.64	35
25R8GD	469	12	108	78.82	63
25R9HD	446	5	49	88.4	22
25T1HD	429	8	63	84.95	50
25T7GD	502	53	35	84.37	28
2606GD	400	18	173	67.14	37
2610HD	452	6	43	89.5	33
2624GD	515	28	48	86.47	22
2635HD	466	5	30	92.18	25
2636GD	521	8	61	87.56	64
2657HD	418	13	30	82.67	15
2658HD	160	38	146	31.68	15
2694HD	450	5	45	89.11	35
26K6E	390	20	79	76	40
26K6GD	489	59	42	82.1	25
26L3GD	441	5	126	74.03	35
26Q3GD	544	8	38	91.42	32
26Q7GD	558	6	27	93.7	18
26R2GD	433	14	137	72.69	34
2705GD	485	21	85	81.43	47
2862E	406	6	86	80.32	31
28G9E	378	32	118	70.89	21
28H3E	371	10	131	71.76	21
28H8E	375	30	98	71.98	13
28K2E	399	16	90	78.31	11
28K3E	326	13	135	63.49	19
28K4E	415	18	88	78.95	20
28K7E	374	8	124	73.24	22
28L7E	361	5	123	70.3	19
28L8E	363	37	114	66.94	20
28M1E	378	23	120	71.84	18
NW0002	394	5	105	77.48	39
NW0005	495	9	31	91.75	17
NW0008	483	6	42	90.28	21
NW0009	475	6	26	92.5	20
NW0019	333	5	140	65.23	22
NW0020	495	11	15	94.2	10
NW0022	460	10	13	89.76	15
NW0023	435	8	69	84.22	38
NW0026	482	5	20	94.13	23
NW0027	449	12	51	87.02	16
NW0032	329	13	30	62.51	23
NW0037	439	14	83	81.15	24
NW0053	489	10	17	93.86	10
NW0054	475	82	15	80.37	22
NW0058	442	11	48	85.31	13
NW0063	490	17	7	94.41	10
NW0065	482	9	13	94.88	18

## Sheet: Table S2
Table S2: Sleep quality assessment metrics estimated with NB.
	Personalized appraoch						Generalized approach
ID	TST	SOL	WASO	SE	NA		TST	SOL	WASO	SE	NA
25L9GD	251	5	323	42.29	15		442	5	139	74.47	21
25M7GD	347	24	218	58.47	29		352	24	213	59.31	19
25M9GD	365	7	218	61.34	18		343	7	240	57.56	20
25N4GD	358	30	193	60.08	21		295	32	245	49.5	20
25P4GD	466	16	108	78.32	15		323	18	243	54.2	26
25P7HD	322	8	167	63.66	12		220	21	251	43.56	15
25R2HD	309	11	158	61.19	22		308	11	160	60.89	20
25R8GD	497	13	70	83.45	11		333	15	217	55.97	19
25R9HD	397	5	93	78.69	18		235	5	220	46.58	18
25T1HD	351	19	130	69.5	19		405	11	85	80.1	13
25T7GD	305	5	234	51.26	13		234	6	303	39.24	15
2606GD	323	19	220	54.29	14		263	22	173	44.2	11
2610HD	384	5	112	75.94	21		338	5	158	66.83	14
2624GD	465	24	102	78.15	17		469	24	98	78.74	17
2635HD	394	5	102	77.92	14		367	7	127	72.57	12
2636GD	331	8	252	55.55	26		265	10	316	44.45	18
2657HD	291	24	118	57.62	9		423	14	27	83.66	6
2658HD	167	34	242	32.97	11		155	35	253	30.59	8
2694HD	471	5	24	93.27	9		357	5	138	70.69	17
26K6E	316	16	154	61.66	26		316	16	153	61.56	19
26K6GD	395	56	135	66.39	16		399	56	133	66.97	16
26L3GD	413	5	172	69.41	22		295	5	290	49.5	21
26Q3GD	373	6	189	62.74	29		269	6	286	45.25	18
26Q7GD	504	6	77	84.71	12		508	5	73	85.38	12
26R2GD	397	16	151	66.64	14		235	34	293	39.41	20
2705GD	377	17	197	63.28	38		306	20	257	51.34	28
2862E	214	36	242	42.33	24		374	35	84	73.89	12
28G9E	355	28	137	66.57	21		425	27	76	79.81	10
28H3E	161	15	335	31.14	16		392	12	109	75.73	17
28H8E	391	33	92	75.05	11		395	33	89	75.82	10
28K2E	374	44	86	73.31	18		353	47	105	69.19	19
28K3E	192	43	271	37.29	16		377	14	118	73.32	15
28K4E	193	26	301	36.67	14		434	19	68	82.57	9
28K7E	295	12	198	57.84	12		429	11	66	84.12	9
28L7E	203	23	261	39.44	19		459	5	45	89.29	7
28L8E	229	48	244	42.29	13		436	5	96	80.42	14
28M1E	119	59	343	22.65	12		297	29	195	56.42	16
NW0002	295	5	197	58.01	16		302	5	192	59.29	16
NW0005	329	35	170	60.89	12		474	15	46	87.86	10
NW0008	391	30	108	73.08	20		342	47	139	63.83	12
NW0009	397	8	102	77.29	13		392	8	107	76.32	15
NW0019	332	5	161	65.03	11		331	5	162	64.84	11
NW0020	444	5	71	84.49	20		488	5	28	92.86	4
NW0022	416	14	71	81.17	7		419	14	68	81.66	7
NW0023	422	17	72	81.7	16		328	20	157	63.5	14
NW0026	378	6	122	73.9	20		448	6	53	87.59	11
NW0027	285	13	213	55.14	16		443	5	63	85.85	8
NW0032	229	25	235	43.48	12		236	25	228	44.81	12
NW0037	461	34	42	85.12	7		352	36	146	65.06	20
NW0053	436	14	66	83.69	9		437	14	66	83.78	9
NW0054	465	87	33	78.68	7		469	87	30	79.27	6
NW0058	418	14	66	80.77	13		380	15	103	73.33	16
NW0063	393	12	110	75.63	20		399	12	104	76.88	17
NW0065	391	16	83	77.04	22		333	17	138	65.52	12
AVERAGE	347.722	20.2963	159.093	64.2311	16.4444		359.241	18.3704	147.63	66.7657	14.463
SD	91.1649	16.5844	80.5236	16.3549	6.1327		78.8143	15.6595	80.5351	15.5286	5.10905

## Sheet: Table S3
Table S3: Sleep quality assessment metrics estimated with regularized logistic regression.
	Personalized approach						Generalized approach
ID	TST	SOL	WASO	SE	NA		TST	SOL	WASO	SE	NA
25L9GD	539	5	45	90.73	7		541	5	43	91.15	6
25M7GD	547	19	23	92.17	2		541	19	30	91.07	3
25M9GD	570	5	15	95.8	5		571	5	14	95.88	5
25N4GD	530	5	55	89.08	12		514	6	71	86.3	13
25P4GD	539	5	47	90.5	7		521	5	65	87.48	6
25P7HD	479	5	16	94.85	5		428	5	68	84.65	12
25R2HD	464	7	30	91.78	8		485	5	11	95.94	7
25R8GD	553	8	22	92.94	5		552	8	23	92.77	9
25R9HD	489	5	6	96.93	3		473	5	21	93.76	6
25T1HD	487	5	9	96.34	3		488	5	8	96.53	2
25T7GD	526	5	60	88.32	16		547	5	38	91.93	17
2606GD	495	14	58	83.11	13		472	19	77	79.24	13
2610HD	492	5	3	97.43	2		495	5	0	98.02	1
2624GD	576	5	10	96.72	4		576	5	9	96.81	4
2635HD	478	5	17	94.65	3		475	5	21	93.96	3
2636GD	574	5	11	96.47	6		558	5	27	93.78	13
2657HD	471	5	24	93.17	6		491	5	4	97.23	4
2658HD	279	9	203	55.25	19		368	5	120	72.77	13
2694HD	495	5	0	98.02	1		495	5	0	98.02	1
26K6E	424	11	73	82.73	16		480	10	11	93.56	3
26K6GD	508	5	78	85.29	10		547	5	39	91.85	9
26L3GD	512	5	73	86.05	10		524	5	61	88.07	7
26Q3GD	582	5	3	97.9	2		565	5	20	94.95	6
26Q7GD	571	5	13	95.97	5		575	5	10	96.64	3
26R2GD	468	11	105	78.57	12		468	11	104	78.66	11
2705GD	557	5	28	93.61	5		559	5	27	93.87	3
2862E	441	5	49	87.14	11		475	5	15	93.97	4
28G9E	515	5	8	96.71	3		505	12	12	94.74	2
28H3E	472	11	29	91.2	10		502	10	0	97.1	1
28H8E	489	23	5	93.76	3		496	17	4	95.11	2
28K2E	489	13	3	95.98	4		487	13	5	95.58	5
28K3E	487	6	17	94.74	5		503	5	1	97.86	2
28K4E	506	5	10	96.29	4		480	18	23	91.33	3
28K7E	483	5	17	94.71	4		499	5	2	97.75	2
28L7E	221	23	243	43.04	22		501	5	3	97.57	3
28L8E	518	5	14	95.57	3		513	5	19	94.64	3
28M1E	501	20	0	95.24	1		501	20	0	95.24	1
Average	495.324	7.97297	38.4324	90.2368	6.94595		449	5	50	88.2	9
NW0002	338	5	158	66.47	20		519	6	10	96.11	3
NW0005	528	5	2	97.87	2		491	23	17	91.78	4
NW0008	463	24	44	86.45	7		503	5	0	98.05	1
NW0009	503	5	0	98.05	1		449	5	49	87.86	8
NW0019	426	5	72	83.35	7		499	5	17	94.96	3
NW0020	334	24	158	63.56	12		497	8	3	96.98	2
NW0022	492	8	8	96	2		482	15	15	93.22	4
NW0023	497	13	3	96.13	4		502	5	0	98.04	1
NW0026	502	5	0	98.04	1		494	5	13	95.64	3
NW0027	504	5	3	97.58	4		394	5	122	74.88	16
NW0032	441	5	75	83.92	15		480	31	25	88.72	3
NW0037	485	31	21	89.65	3		493	12	12	94.53	2
NW0053	486	12	18	93.28	4		518	30	39	87.56	4
NW0054	500	31	55	84.6	6		480	8	25	92.75	4
NW0058	468	12	33	90.43	4		509	5	0	98.07	1
NW0063	509	5	0	98.07	1		480	16	8	94.48	3
NW0065	468	16	19	92.22	4		500.185	8.83333	26.1296	92.5483	5.16667
SD	67.4259	7.06226	50.9652	10.8312	5.18851		40.3321	6.52932	29.6928	5.76084	4.13795

## Sheet: Table S4
Table S4: Sleep quality assessment metrics estimated with RF.
	Personalized approach						Generalized approach
ID	TST	SOL	WASO	SE	NA		TST	SOL	WASO	SE	NA
NW0027	483	5	23	93.6	16		536	5	48	90.23	23
28K3E	423	5	81	82.38	36		499	20	70	83.99	38
26K6E	441	12	49	86.05	18		532	5	54	89.33	41
NW0054	497	30	60	84.01	19		498	6	87	83.61	33
25R8GD	512	13	55	86.05	19		472	5	113	79.33	40
2606GD	389	17	159	65.38	39		432	5	62	85.54	35
2610HD	447	5	48	88.51	36		448	8	45	88.71	38
NW0037	486	31	20	89.83	5		519	11	49	87.23	38
28K7E	426	6	74	83.53	23		424	5	70	83.94	38
25M9GD	516	5	68	86.72	41		468	5	28	92.57	26
2694HD	457	5	38	90.5	26		489	5	97	82.1	71
26Q7GD	574	5	11	96.39	12		432	17	118	72.61	47
NW0065	464	14	25	91.43	21		468	5	28	92.57	23
NW0058	422	12	79	81.55	22		548	5	37	92.1	23
NW0002	309	5	187	60.77	32		469	5	26	92.87	12
NW0005	510	6	20	94.44	6		504	5	81	84.71	54
28H8E	442	17	57	84.84	28		463	5	31	91.68	19
NW0026	484	6	17	94.62	20		298	5	192	59.01	53
NW0009	495	6	8	96.49	15		464	5	31	91.88	31
26Q3GD	531	5	54	89.23	40		447	11	43	87.22	34
NW0053	455	13	48	87.24	15		533	6	52	89.58	32
25M7GD	508	19	63	85.51	33		505	5	80	84.87	44
28M1E	395	14	113	75.07	51		529	5	56	88.98	43
2657HD	432	12	45	85.54	22		555	5	31	93.19	35
NW0020	481	5	35	91.53	7		429	14	136	72.1	48
NW0063	489	10	16	94.12	4		538	5	47	90.42	28
2624GD	541	5	45	90.84	22		453	5	39	89.61	36
28L7E	421	5	83	81.99	23		484	25	19	90.89	19
26K6GD	495	5	90	83.19	25		491	11	11	94.87	15
25T7GD	512	5	74	85.97	18		468	24	25	89.73	18
26L3GD	440	5	146	73.87	48		455	15	36	89.21	35
28H3E	379	11	122	73.31	40		481	8	21	93.57	20
26R2GD	450	11	121	75.63	34		465	10	45	88.57	23
2705GD	530	5	56	88.99	33		474	6	26	92.94	24
NW0032	334	21	153	63.46	33		474	5	30	92.31	24
NW0022	473	12	24	92.2	16		497	5	35	91.69	17
25P4GD	516	5	69	86.72	19		483	21	18	91.82	29
NW0023	486	15	11	94	14		421	5	76	82.79	33
25L9GD	457	5	127	76.92	35		512	7	16	94.9	6
28K4E	452	5	64	86	23		466	30	34	87.1	26
2658HD	210	18	264	41.49	36		490	6	13	95.52	19
2862E	335	27	134	66.27	49		427	5	70	83.55	30
28K2E	457	14	35	89.6	19		495	5	21	94.2	11
NW0019	413	5	83	80.9	16		472	12	25	92	17
25R9HD	465	5	30	92.07	23		435	16	61	84.12	34
2635HD	468	5	28	92.57	17		483	5	19	94.43	17
25N4GD	529	5	56	88.91	22		478	5	28	92.64	23
28L8E	483	5	49	89.1	21		372	7	130	70.79	43
25P7HD	431	5	63	85.25	42		472	34	31	87.15	14
28G9E	489	5	34	91.83	15		487	12	17	93.47	8
25T1HD	462	5	33	91.49	28		503	7	77	85.11	16
25R2HD	415	8	78	82.18	32		448	10	56	86.47	27
2636GD	552	5	34	92.69	40		477	7	30	91.91	22
NW0008	451	30	50	84.21	33		463	14	26	91.13	24
Average	457.667	10	66.8333	84.5737	25.5926		474.537	9.35185	50.8704	87.8307	29.2037
SD	63.4909	7.19801	49.5956	10.203	11.3844		43.2054	6.8767	35.9324	6.8469	12.6943

## Sheet: Table S5
Table S5: Sleep quality assessment metrics estimated with AB.
	Personalized approach						Generalized approach
ID	TST	SOL	WASO	SE	NA		TST	SOL	WASO	SE	NA
25L9GD	493	5	91	82.98	44		367	5	217	61.84	34
25M7GD	514	18	57	86.6	28		492	23	74	82.81	30
25M9GD	523	5	62	87.9	48		537	14	40	90.25	42
25N4GD	532	5	54	89.33	20		527	10	53	88.57	33
25P4GD	519	5	67	87.14	26		499	14	77	83.78	42
25P7HD	449	5	46	88.91	25		424	5	71	83.96	27
25R2HD	461	10	30	91.29	19		382	12	107	75.64	35
25R8GD	518	12	60	87.06	27		469	12	108	78.82	63
25R9HD	456	5	39	90.39	31		446	5	49	88.4	22
25T1HD	466	5	30	92.18	24		429	8	63	84.95	50
25T7GD	516	5	69	86.72	30		502	53	35	84.37	28
2606GD	416	14	135	69.83	39		400	18	173	67.14	37
2610HD	449	5	46	88.91	29		452	6	43	89.5	33
2624GD	545	5	41	91.51	12		515	28	48	86.47	22
2635HD	472	5	23	93.47	12		466	5	30	92.18	25
2636GD	542	5	43	91.09	44		521	8	61	87.56	64
2657HD	441	5	20	87.23	15		418	13	30	82.67	15
2658HD	247	5	239	48.91	34		160	38	146	31.68	15
2694HD	452	5	43	89.5	24		450	5	45	89.11	35
26K6E	433	12	57	84.39	26		390	20	79	76	40
26K6GD	500	5	86	83.95	25		489	59	42	82.1	25
26L3GD	450	5	135	75.63	53		441	5	126	74.03	35
26Q3GD	551	5	34	92.6	38		544	8	38	91.42	32
26Q7GD	571	5	14	95.97	10		558	6	27	93.7	18
26R2GD	457	5	120	76.81	42		433	14	137	72.69	34
2705GD	525	5	60	88.24	34		485	21	85	81.43	47
2862E	402	6	88	79.53	34		406	6	86	80.32	31
28G9E	508	5	15	95.4	3		378	32	118	70.89	21
28H3E	420	9	83	81.24	30		371	10	131	71.76	21
28H8E	466	17	33	89.44	21		375	30	98	71.98	13
28K2E	462	14	30	90.58	33		399	16	90	78.31	11
28K3E	410	5	90	79.75	38		326	13	135	63.49	19
28K4E	459	5	57	87.33	24		415	18	88	78.95	20
28K7E	447	6	53	87.65	38		374	8	124	73.24	22
28L7E	405	5	96	78.87	42		361	5	123	70.3	19
28L8E	449	5	82	82.92	32		363	37	114	66.94	20
28M1E	448	20	53	85.16	43		378	23	120	71.84	18
Average	469.568	7.24324	64.3514	85.5786	29.6486		394	5	105	77.48	39
NW0002	327	5	169	64.31	32		495	9	31	91.75	17
NW0005	494	6	36	91.47	27		483	6	42	90.28	21
NW0008	452	30	49	84.39	33		475	6	26	92.5	20
NW0009	491	6	12	95.61	16		333	5	140	65.23	22
NW0019	417	5	79	81.68	30		495	11	15	94.2	10
NW0020	477	5	39	90.77	14		460	10	13	89.76	15
NW0022	467	12	29	91.12	16		435	8	69	84.22	38
NW0023	476	13	23	92.06	27		482	5	20	94.13	23
NW0026	482	5	20	94.13	20		449	12	51	87.02	16
NW0027	484	5	23	93.7	16		329	13	30	62.51	23
NW0032	338	15	166	64.32	42		439	14	83	81.15	24
NW0037	486	31	20	89.83	7		489	10	17	93.86	10
NW0053	459	12	46	88	25		475	82	15	80.37	22
NW0054	496	29	62	83.93	26		442	11	48	85.31	13
NW0058	434	12	67	83.77	27		490	17	7	94.41	10
NW0063	502	10	2	96.72	4		482	9	13	94.88	18
NW0065	453	14	36	89.26	35		436.833	15.6667	73.2593	80.7065	26.6481
SD	56.1402	6.54927	44.1294	8.65143	11.1589		69.5744	14.826	46.9629	11.5129	12.2492

## Sheet: Table S6
Table S6: Sleep quality assessment metrics estimated with XGB.
	Personalized approach						Generalized approach
ID	TST	SOL	WASO	SE	NA		TST	SOL	WASO	SE	NA
25L9GD	447	5	137	75.32	36		542	5	42	91.24	12
25M7GD	519	5	65	87.45	32		512	20	57	86.27	17
25M9GD	532	5	53	89.33	31		539	5	47	90.5	27
25N4GD	533	5	53	89.5	21		517	6	68	86.81	21
25P4GD	519	5	67	87.14	14		503	5	83	84.45	21
25P7HD	453	5	42	89.7	24		442	5	52	87.43	19
25R2HD	459	8	34	90.79	17		457	8	36	90.4	21
25R8GD	516	12	52	86.64	22		528	12	40	88.66	21
25R9HD	463	5	32	91.77	21		441	5	53	87.31	23
25T1HD	468	5	27	92.67	24		481	5	14	95.25	13
25T7GD	529	5	56	88.91	23		511	5	75	85.8	45
2606GD	416	14	135	69.83	41		435	17	115	73.03	30
2610HD	454	5	42	89.8	29		484	5	11	95.84	11
2624GD	553	5	33	92.86	10		566	5	19	95.13	12
2635HD	472	5	23	93.47	10		474	5	21	93.86	5
2636GD	549	5	37	92.18	38		510	5	76	85.63	43
2657HD	437	12	17	86.53	19		475	5	19	93.96	13
2658HD	242	5	245	47.82	32		321	5	170	63.47	34
2694HD	458	5	37	90.69	26		474	5	21	93.86	20
26K6E	446	12	44	87.02	22		462	11	28	90.05	18
26K6GD	499	6	86	83.78	23		537	6	48	90.17	19
26L3GD	466	5	119	78.32	39		516	5	70	86.64	22
26Q3GD	546	5	39	91.76	31		538	5	47	90.5	25
26Q7GD	572	5	13	96.13	9		573	5	12	96.22	8
26R2GD	480	5	97	80.67	28		447	12	120	75.13	31
2705GD	532	5	53	89.41	32		549	5	36	92.27	11
2862E	384	27	85	75.87	43		461	5	31	91.1	16
28G9E	508	5	15	95.4	5		501	24	3	94.08	5
28H3E	425	10	77	82.21	25		497	11	5	96.03	10
28H8E	474	17	25	90.98	18		480	24	12	92.13	11
28K2E	456	14	35	89.5	15		466	15	24	91.36	19
28K3E	428	5	75	83.35	33		480	7	23	93.38	14
28K4E	470	5	46	89.43	19		472	18	31	89.9	12
28K7E	437	6	63	85.69	30		483	6	17	94.61	15
28L7E	409	5	92	79.65	24		492	5	12	95.72	12
28L8E	483	5	49	89.2	21		507	5	25	93.63	8
28M1E	443	10	68	84.3	32		492	20	9	93.53	13
Average	472.351	7.37838	61.2973	86.083	24.8378		433	5	64	85.05	24
NW0002	326	5	170	64.01	26		517	8	10	95.83	2
NW0005	509	9	17	94.35	7		470	30	30	87.85	15
NW0008	447	26	58	83.46	33		497	6	6	96.88	10
NW0009	499	6	4	97.17	7		436	5	60	85.41	20
NW0019	427	5	70	83.55	18		502	5	14	95.53	3
NW0020	484	5	32	92.01	6		489	11	8	95.32	7
NW0022	470	12	26	91.71	9		472	16	25	91.29	17
NW0023	483	9	20	93.42	23		497	5	5	97.17	7
NW0026	481	6	21	93.94	25		485	5	22	93.9	12
NW0027	480	5	26	93.02	15		381	7	124	72.41	28
NW0032	340	15	164	64.61	40		479	14	44	88.45	8
NW0037	488	31	18	90.2	4		493	12	12	94.53	3
NW0053	465	13	38	89.25	15		510	7	70	86.29	6
NW0054	498	30	59	84.18	23		469	12	33	90.53	7
NW0058	433	12	68	83.57	24		507	8	0	97.59	1
NW0063	501	10	3	96.53	6		471	14	18	92.71	12
NW0065	459	14	30	90.34	27		486.537	9.11111	39.2037	90.0387	15.9074
SD	57.4751	6.52256	45.2822	8.9442	10.0592		42.1523	6.03032	34.7152	6.63411	9.50326

## Sheet: Table S7
Table S7: All values are AUC.
	Personalized approach						Generalized approach
pptid	NB	LR	RF	AdaBoost	XGB		NB	LR	RF	AdaBoost	XGB
25L9GD	0.79	0.77	0.74	0.72	0.69		0.78	0.78	0.69	0.79	0.79
25M7GD	0.95	0.93	0.92	0.92	0.95		0.94	0.93	0.95	0.96	0.96
25M9GD	0.79	0.81	0.82	0.84	0.84		0.78	0.81	0.85	0.86	0.87
25N4GD	0.9	0.95	0.94	0.91	0.94		0.9	0.93	0.94	0.95	0.96
25P4GD	0.95	0.93	0.95	0.95	0.96		0.95	0.94	0.95	0.97	0.97
25R8GD	0.87	0.83	0.83	0.85	0.88		0.87	0.85	0.85	0.88	0.88
25T7GD	0.77	0.84	0.81	0.81	0.88		0.77	0.84	0.81	0.85	0.86
2606GD	0.95	0.93	0.85	0.9	0.89		0.95	0.94	0.94	0.95	0.96
2624GD	0.74	0.8	0.8	0.78	0.89		0.74	0.8	0.72	0.79	0.81
2636GD	0.76	0.74	0.84	0.83	0.85		0.73	0.73	0.76	0.82	0.81
26K6GD	0.93	0.92	0.9	0.91	0.89		0.93	0.92	0.92	0.94	0.95
26L3GD	0.87	0.84	0.84	0.85	0.9		0.87	0.86	0.83	0.88	0.89
26Q3GD	0.82	0.86	0.83	0.86	0.9		0.8	0.84	0.89	0.89	0.89
26Q7GD	0.76	0.79	0.7	0.71	0.77		0.75	0.81	0.66	0.81	0.8
26R2GD	0.89	0.91	0.9	0.89	0.89		0.89	0.91	0.91	0.92	0.92
2705GD	0.89	0.84	0.9	0.87	0.9		0.88	0.87	0.88	0.92	0.93
25P7HD	0.77	0.84	0.82	0.85	0.84		0.76	0.81	0.83	0.82	0.85
25R2HD	0.75	0.83	0.75	0.76	0.81		0.75	0.78	0.74	0.78	0.78
25R9HD	0.82	0.8	0.78	0.78	0.83		0.81	0.78	0.82	0.85	0.85
25T1HD	0.74	0.75	0.73	0.73	0.77		0.74	0.76	0.77	0.78	0.78
2610HD	0.74	0.8	0.82	0.85	0.85		0.73	0.78	0.72	0.81	0.82
2635HD	0.91	0.9	0.93	0.93	0.95		0.91	0.91	0.92	0.95	0.95
2657HD	0.97	0.94	0.89	0.95	0.96		0.96	0.95	0.86	0.95	0.95
2658HD	0.97	0.98	0.92	0.95	0.95		0.97	0.98	0.95	0.97	0.98
2694HD	0.87	0.83	0.92	0.93	0.95		0.87	0.82	0.85	0.92	0.92
26K6E	0.82	0.83	0.8	0.69	0.78		0.82	0.85	0.74	0.83	0.83
2862E	0.86	0.78	0.79	0.84	0.8		0.85	0.84	0.8	0.87	0.88
28G9E	0.62	0.58	0.62	0.56	0.57		0.62	0.61	0.63	0.62	0.63
28H3E	0.62	0.61	0.53	0.52	0.56		0.61	0.58	0.64	0.6	0.61
28H8E	0.53	0.5	0.5	0.52	0.5		0.52	0.51	0.47	0.52	0.53
28K2E	0.59	0.65	0.5	0.59	0.62		0.58	0.58	0.56	0.6	0.59
28K3E	0.74	0.7	0.68	0.72	0.74		0.75	0.67	0.56	0.73	0.73
28K4E	0.82	0.83	0.78	0.68	0.76		0.83	0.83	0.69	0.83	0.83
28K7E	0.72	0.7	0.65	0.56	0.67		0.71	0.7	0.7	0.71	0.71
28L7E	0.65	0.58	0.54	0.51	0.55		0.65	0.61	0.5	0.63	0.63
28L8E	0.7	0.69	0.62	0.63	0.69		0.7	0.68	0.57	0.69	0.69
28M1E	0.7	0.57	0.61	0.6	0.65		0.7	0.68	0.67	0.68	0.68
NW0002	0.87	0.87	0.87	0.87	0.89		0.87	0.87	0.86	0.89	0.89
NW0005	0.87	0.86	0.8	0.65	0.84		0.87	0.87	0.77	0.88	0.88
NW0008	0.95	0.94	0.97	0.98	0.98		0.95	0.95	0.98	0.98	0.98
NW0009	0.82	0.81	0.84	0.87	0.9		0.82	0.83	0.83	0.88	0.89
NW0019	0.9	0.9	0.86	0.84	0.88		0.9	0.9	0.89	0.9	0.9
NW0020	0.91	0.87	0.89	0.9	0.88		0.91	0.88	0.82	0.92	0.92
NW0022	0.85	0.86	0.86	0.87	0.88		0.85	0.86	0.81	0.86	0.86
NW0023	0.93	0.9	0.85	0.67	0.79		0.93	0.89	0.86	0.93	0.93
NW0026	0.85	0.86	0.85	0.79	0.87		0.85	0.88	0.81	0.9	0.9
NW0027	0.89	0.86	0.9	0.78	0.9		0.89	0.87	0.79	0.9	0.9
NW0032	0.97	0.93	0.96	0.92	0.98		0.97	0.94	0.96	0.96	0.96
NW0037	0.92	0.92	0.84	0.72	0.89		0.92	0.91	0.91	0.92	0.92
NW0053	0.93	0.93	0.93	0.94	0.96		0.93	0.95	0.9	0.95	0.95
NW0054	0.97	0.96	0.95	0.92	0.97		0.97	0.96	0.94	0.97	0.97
NW0058	0.95	0.94	0.92	0.92	0.94		0.95	0.95	0.92	0.97	0.97
NW0063	0.81	0.86	0.77	0.74	0.95		0.81	0.83	0.73	0.86	0.87
NW0065	0.92	0.89	0.96	0.93	0.97		0.91	0.9	0.91	0.97	0.97
Average	0.830556	0.824815	0.810556	0.797407	0.838704		0.827222	0.827963	0.800556	0.851111	0.854259

## Sheet: Table S8
Table S8: Classifier performance evaluation metrics, comparing personalized and generalized NB.
	Personalized Naïve Bayes						Generalized Naïve Bayes
pptid	ACC	SN	SP	MCC	AUC		ACC	SN	SP	MCC	AUC
25L9GD	0.686869	0.838337	0.6	0.424976	0.78644		0.727273	0.452656	0.884768	0.38122	0.784452
25M7GD	0.737374	0.956522	0.697211	0.481991	0.949947		0.738215	0.913043	0.706175	0.459368	0.940726
25M9GD	0.654072	0.6875	0.651142	0.190305	0.792328		0.631402	0.739583	0.621918	0.200299	0.779961
25N4GD	0.699412	0.922414	0.675349	0.364616	0.903488		0.594458	0.922414	0.55907	0.285602	0.903953
25P4GD	0.892527	0.820809	0.904715	0.63831	0.952267		0.694374	0.965318	0.64833	0.435511	0.953448
25R8GD	0.848027	0.491379	0.934307	0.473955	0.870422		0.731318	0.896552	0.691345	0.47126	0.873984
25T7GD	0.609572	0.795181	0.579512	0.259931	0.767311		0.510495	0.861446	0.453659	0.221913	0.766591
2606GD	0.837951	0.948787	0.787805	0.686937	0.946846		0.757347	0.978437	0.657317	0.590808	0.948721
2624GD	0.784215	0.439716	0.830476	0.217611	0.738656		0.788413	0.432624	0.83619	0.218925	0.740659
2636GD	0.6356	0.804688	0.61524	0.26271	0.755475		0.530647	0.820312	0.495767	0.196362	0.732082
26K6GD	0.797649	0.860104	0.785571	0.510453	0.928232		0.803526	0.860104	0.792585	0.518584	0.92927
26L3GD	0.8178	0.719723	0.849224	0.53815	0.87146		0.677582	0.84083	0.625277	0.399747	0.871671
26Q3GD	0.694958	0.890244	0.680505	0.301402	0.82415		0.52521	0.902439	0.497292	0.202873	0.802814
26Q7GD	0.846348	0.309091	0.872359	0.111087	0.762972		0.851385	0.290909	0.878521	0.105977	0.751128
26R2GD	0.810243	0.747541	0.831828	0.543675	0.89397		0.647355	0.960656	0.539503	0.443627	0.893263
2705GD	0.759866	0.830846	0.745455	0.452011	0.886632		0.652393	0.860697	0.610101	0.353334	0.884587
25P7HD	0.700297	0.661972	0.706559	0.269331	0.766621		0.568744	0.901408	0.514384	0.290068	0.761009
25R2HD	0.699308	0.650442	0.713376	0.314305	0.754053		0.69634	0.650442	0.709554	0.310487	0.749839
25R9HD	0.822772	0.587629	0.847755	0.324379	0.815619		0.556436	0.865979	0.523549	0.229634	0.811074
25T1HD	0.744807	0.643939	0.759954	0.299054	0.741657		0.803165	0.431818	0.858931	0.255518	0.737809
2610HD	0.781405	0.511628	0.806486	0.214037	0.740497		0.70821	0.616279	0.716757	0.200609	0.732879
2635HD	0.827893	0.762712	0.831933	0.346703	0.911587		0.778437	0.779661	0.778361	0.30043	0.911453
2657HD	0.745796	0.987097	0.702103	0.506126	0.966385		0.936696	0.76129	0.968458	0.750124	0.964558
2658HD	0.925816	0.937313	0.903226	0.835291	0.971918		0.933729	0.958209	0.88563	0.850832	0.973268
2694HD	0.908012	0.255556	0.97177	0.301449	0.869803		0.768546	0.733333	0.771987	0.323013	0.870346
26K6E	0.741715	0.756637	0.7375	0.423842	0.818402		0.746589	0.752212	0.745	0.428136	0.815915
2862E	0.562253	0.899441	0.489796	0.300822	0.856606		0.829051	0.698324	0.857143	0.495486	0.84827
28G9E	0.644465	0.517241	0.69201	0.193433	0.624862		0.755159	0.386207	0.893041	0.321435	0.6228
28H3E	0.441546	0.709559	0.346003	0.0519541	0.620565		0.714976	0.382353	0.833552	0.228231	0.611012
28H8E	0.601151	0.238971	0.728923	-0.0320301	0.528322		0.629914	0.216912	0.775616	-0.00788865	0.516504
28K2E	0.666667	0.303483	0.7558	0.0540411	0.591921		0.634314	0.303483	0.715507	0.0166766	0.581743
28K3E	0.67607	0.909859	0.552749	0.450352	0.742078		0.683852	0.4	0.833581	0.257497	0.747038
28K4E	0.573739	0.99005	0.475294	0.375871	0.817445		0.817317	0.427861	0.909412	0.366428	0.825985
28K7E	0.662096	0.628459	0.673177	0.265651	0.716648		0.801175	0.379447	0.940104	0.398696	0.711751
28L7E	0.559339	0.761404	0.48183	0.221023	0.654032		0.697471	0.112281	0.921938	0.0541949	0.652629
28L8E	0.613469	0.775148	0.540214	0.294166	0.702429		0.730627	0.352071	0.902145	0.308459	0.700232
28M1E	0.472433	0.931159	0.309278	0.245528	0.69893		0.617871	0.565217	0.636598	0.180102	0.696913
NW0002	0.752456	0.870813	0.721879	0.488719	0.872747		0.759332	0.856459	0.73424	0.489862	0.873221
NW0005	0.675	0.869565	0.661721	0.268782	0.867981		0.914815	0.637681	0.933729	0.460177	0.869608
NW0008	0.815126	0.952381	0.803445	0.46571	0.952767		0.732026	0.97619	0.711246	0.389414	0.951434
NW0009	0.795521	0.614035	0.806186	0.233357	0.816332		0.797468	0.631579	0.807216	0.243672	0.818448
NW0019	0.873777	0.820896	0.899563	0.715675	0.897197		0.878669	0.820896	0.906841	0.725546	0.903474
NW0020	0.885932	0.780488	0.890208	0.378742	0.90882		0.952471	0.560976	0.968348	0.460214	0.913319
NW0022	0.863548	0.694118	0.878852	0.421831	0.847078		0.868421	0.694118	0.884166	0.430771	0.847359
NW0023	0.882012	0.671329	0.915825	0.545576	0.926997		0.769826	0.916084	0.746352	0.480975	0.926452
NW0026	0.772461	0.775	0.772358	0.245225	0.851435		0.891602	0.45	0.909553	0.227727	0.848425
NW0027	0.666021	0.929825	0.633297	0.356521	0.894026		0.88577	0.535088	0.929271	0.444605	0.887817
NW0032	0.798479	0.983957	0.696165	0.653835	0.965976		0.811787	0.983957	0.716814	0.67228	0.968737
NW0037	0.886427	0.548913	0.955506	0.562918	0.920519		0.798707	0.880435	0.78198	0.52882	0.921132
NW0053	0.886865	0.863636	0.887888	0.430507	0.925562		0.887824	0.863636	0.888889	0.432283	0.930908
NW0054	0.91885	0.820755	0.940268	0.73509	0.966311		0.921386	0.811321	0.945417	0.739518	0.967506
NW0058	0.897683	0.80303	0.911504	0.620767	0.951989		0.843629	0.856061	0.841814	0.539488	0.952388
NW0063	0.778633	0.552632	0.787213	0.152715	0.811872		0.782483	0.421053	0.796204	0.0998224	0.809033
NW0065	0.809055	0.875	0.806911	0.290115	0.915777		0.698819	0.875	0.693089	0.21187	0.912903
Average:	0.748914	0.739055	0.741393	0.375547	0.830266		0.749353	0.68784	0.766375	0.363345	0.827824

## Sheet: Table S9
Table S9: Classifier performance evaluation metrics, comparing personalized and generalized RLR.
	Personalized Regularized Logistic Regression						Generalized Regularized Logistic Regression
pptid	ACC	SN	SP	MCC	AUC		ACC	SN	SP	MCC	AUC
25L9GD	0.683502	0.17321	0.976159	0.267627	0.774701		0.683502	0.163972	0.981457	0.271564	0.777522
25M7GD	0.905724	0.391304	1	0.593324	0.927356		0.905724	0.429348	0.993028	0.589705	0.926371
25M9GD	0.917716	0.104167	0.989041	0.188441	0.807125		0.90848	0.0833333	0.980822	0.113311	0.809903
25N4GD	0.942065	0.637931	0.974884	0.652212	0.9498		0.918556	0.698276	0.942326	0.584349	0.930409
25P4GD	0.922754	0.508671	0.993124	0.652613	0.934622		0.922754	0.606936	0.976424	0.66142	0.937501
25R8GD	0.834593	0.228448	0.98123	0.350727	0.834766		0.825357	0.193966	0.978102	0.297855	0.851675
25T7GD	0.902603	0.36747	0.989268	0.518423	0.843908		0.890848	0.337349	0.980488	0.450377	0.839077
2606GD	0.829555	0.512129	0.973171	0.58755	0.930363		0.850546	0.566038	0.979268	0.642958	0.938538
2624GD	0.894207	0.106383	1	0.308196	0.796109		0.896725	0.12766	1	0.338043	0.802823
2636GD	0.88581	0.0625	0.984948	0.104581	0.741144		0.867338	0.09375	0.960489	0.0807435	0.725328
26K6GD	0.884971	0.38342	0.981964	0.504313	0.92446		0.889169	0.357513	0.991984	0.52372	0.920354
26L3GD	0.842149	0.366782	0.994457	0.532688	0.839346		0.844668	0.391003	0.990022	0.538688	0.857968
26Q3GD	0.921849	0.207317	0.974729	0.241741	0.863289		0.919328	0.158537	0.975632	0.188559	0.841948
26Q7GD	0.942905	0.127273	0.982394	0.154628	0.794974		0.947103	0.109091	0.987676	0.158054	0.811508
26R2GD	0.869857	0.629508	0.952596	0.639446	0.908922		0.868178	0.62623	0.951467	0.634604	0.909388
2705GD	0.879093	0.283582	1	0.497566	0.83662		0.875735	0.263682	1	0.478946	0.874753
25P7HD	0.89911	0.288732	0.998849	0.500759	0.836598		0.828882	0.366197	0.904488	0.276503	0.80757
25R2HD	0.788328	0.0530974	1	0.204262	0.826738		0.793274	0.0840708	0.997452	0.238145	0.777332
25R9HD	0.911881	0.0824742	1	0.274133	0.795881		0.910891	0.257732	0.980285	0.347361	0.775578
25T1HD	0.882295	0.121212	0.996587	0.292274	0.746018		0.884273	0.113636	1	0.316682	0.756171
2610HD	0.922849	0.174419	0.992432	0.319036	0.795682		0.914936	0	1	0	0.781779
2635HD	0.9545	0.576271	0.977941	0.57281	0.896658		0.964392	0.542373	0.990546	0.633327	0.905756
2657HD	0.89911	0.367742	0.995327	0.54937	0.942354		0.854599	0.0516129	1	0.209877	0.945369
2658HD	0.613254	0.41791	0.997067	0.43795	0.975927		0.587537	0.379104	0.997067	0.409515	0.975178
2694HD	0.910979	0	1	0	0.825691		0.910979	0	1	0	0.823592
26K6E	0.7846	0.163717	0.96	0.204714	0.829411		0.805068	0.159292	0.9875	0.293975	0.849145
2862E	0.849802	0.402235	0.945978	0.415518	0.781278		0.84585	0.178771	0.989196	0.325065	0.842623
28G9E	0.742026	0.0517241	1	0.195423	0.580837		0.761726	0.124138	1	0.305819	0.605201
28H3E	0.724638	0.0367647	0.969856	0.0165863	0.608894		0.74686	0.0367647	1	0.165431	0.577464
28H8E	0.769895	0.117647	1	0.299531	0.502043		0.768936	0.113971	1	0.294668	0.512677
28K2E	0.802941	0	1	0	0.651076		0.82549	0.119403	0.998779	0.304025	0.582481
28K3E	0.651751	0.0647887	0.961367	0.0583713	0.698711		0.656615	0.0056338	1	0.0607903	0.672287
28K4E	0.833492	0.303483	0.958824	0.358079	0.825543		0.830637	0.233831	0.971765	0.322165	0.833562
28K7E	0.791381	0.339921	0.940104	0.36033	0.70154		0.755142	0.0118577	1	0.0945817	0.701916
28L7E	0.703307	0	0.973082	-0.0872394	0.579368		0.72179	0.00701754	0.995962	0.019173	0.612892
28L8E	0.72417	0.12426	0.995979	0.279228	0.689682		0.723247	0.112426	1	0.283163	0.682437
28M1E	0.741445	0.0144928	1	0.103592	0.571614		0.76616	0.108696	1	0.287284	0.67861
NW0002	0.829077	0.54067	0.903585	0.459632	0.868167		0.839882	0.349282	0.966625	0.428732	0.869367
NW0005	0.95	0.26087	0.997033	0.45677	0.861459		0.952778	0.289855	0.998022	0.498371	0.866691
NW0008	0.913165	0.75	0.927052	0.548422	0.940935		0.947712	0.571429	0.979737	0.60768	0.950656
NW0009	0.946446	0.0350877	1	0.182222	0.813438		0.944499	0	1	0	0.826099
NW0019	0.823875	0.525373	0.969432	0.58881	0.901705		0.758317	0.286567	0.988355	0.426848	0.900597
NW0020	0.962928	0.463415	0.983185	0.475431	0.868146		0.963878	0.439024	0.985163	0.470957	0.878278
NW0022	0.911306	0.0941176	0.985122	0.150789	0.856911		0.922027	0.0941176	0.996812	0.243377	0.860936
NW0023	0.869439	0.0979021	0.993266	0.228516	0.897106		0.871373	0.20979	0.977553	0.301483	0.889336
NW0026	0.960938	0	1	0	0.855005		0.960938	0	1	0	0.882114
NW0027	0.891578	0.0701754	0.993471	0.172478	0.859391		0.908035	0.192982	0.996736	0.386829	0.874072
NW0032	0.824144	0.63369	0.929204	0.606257	0.929054		0.81749	0.569519	0.954277	0.594035	0.935801
NW0037	0.888273	0.413043	0.985539	0.545029	0.916438		0.878116	0.418478	0.972191	0.502301	0.909011
NW0053	0.98466	0.704545	0.996997	0.794105	0.927723		0.981783	0.704545	0.993994	0.759102	0.949313
NW0054	0.94421	0.688679	1	0.803024	0.958208		0.928149	0.599057	1	0.742184	0.957756
NW0058	0.917954	0.575758	0.96792	0.60068	0.941606		0.919884	0.393939	0.996681	0.580912	0.954956
NW0063	0.974013	0.289474	1	0.530915	0.857813		0.963426	0	1	0	0.828763
NW0065	0.938976	0.625	0.949187	0.395942	0.892054		0.968504	0.5625	0.981707	0.51413	0.901296
Average:	0.860965	0.288126	0.98134	0.364589	0.824337		0.859224	0.257302	0.986483	0.3481	0.827588

## Sheet: Table S10
Table S10: Classifier performance evaluation metrics, comparing personalized and generalized RF.
	Personalized Random Forest						Generalized Random Forest
pptid	ACC	SN	SP	MCC	AUC		ACC	SN	SP	MCC	AUC
25L9GD	0.662458	0.330254	0.85298	0.215097	0.742406		0.691077	0.187067	0.980132	0.29526	0.689136
25M7GD	0.911616	0.597826	0.969124	0.634216	0.924693		0.929293	0.733696	0.965139	0.722025	0.951552
25M9GD	0.88581	0.447917	0.924201	0.329354	0.824225		0.90848	0.489583	0.945205	0.413918	0.846937
25N4GD	0.935348	0.637931	0.967442	0.622486	0.94166		0.90848	0.784483	0.92186	0.591539	0.939022
25P4GD	0.924433	0.635838	0.973477	0.672913	0.953908		0.896725	0.797688	0.913556	0.639142	0.952942
25R8GD	0.839631	0.405172	0.944734	0.421305	0.827573		0.835432	0.362069	0.949948	0.393637	0.846709
25T7GD	0.858942	0.421687	0.929756	0.375611	0.812865		0.853065	0.554217	0.901463	0.428284	0.808819
2606GD	0.785055	0.654987	0.843902	0.498889	0.853361		0.866499	0.698113	0.942683	0.679175	0.940321
2624GD	0.895886	0.404255	0.961905	0.432495	0.798538		0.896725	0.326241	0.973333	0.400928	0.719196
2636GD	0.896725	0.273438	0.971778	0.334344	0.837621		0.84047	0.390625	0.894638	0.257722	0.762075
26K6GD	0.879933	0.585492	0.936874	0.542412	0.896633		0.906801	0.481865	0.988978	0.614595	0.915894
26L3GD	0.813602	0.619377	0.875831	0.494052	0.836634		0.834593	0.435986	0.962306	0.500685	0.828779
26Q3GD	0.885714	0.280488	0.930505	0.192634	0.82967		0.906723	0.5	0.936823	0.380461	0.891317
26Q7GD	0.946264	0.109091	0.986796	0.152907	0.700488		0.916037	0.145455	0.953345	0.0940636	0.659891
26R2GD	0.876574	0.691803	0.940181	0.664096	0.902681		0.871537	0.760656	0.909707	0.665433	0.910669
2705GD	0.88581	0.432836	0.977778	0.533362	0.896555		0.879933	0.378109	0.981818	0.499993	0.880602
25P7HD	0.871414	0.471831	0.936709	0.43577	0.818287		0.873393	0.492958	0.935558	0.450779	0.830937
25R2HD	0.79723	0.389381	0.91465	0.351563	0.753464		0.810089	0.283186	0.961783	0.351441	0.743191
25R9HD	0.90297	0.28866	0.968237	0.328016	0.784194		0.868317	0.546392	0.902519	0.38052	0.815037
25T1HD	0.884273	0.318182	0.969283	0.384075	0.734301		0.87636	0.234848	0.972696	0.308307	0.773968
2610HD	0.910979	0.511628	0.948108	0.445941	0.824808		0.902077	0.244186	0.963243	0.255141	0.721534
2635HD	0.946588	0.661017	0.964286	0.566333	0.934705		0.959446	0.59322	0.982143	0.610626	0.924592
2657HD	0.924827	0.683871	0.968458	0.695339	0.893669		0.878338	0.309677	0.981308	0.430536	0.855837
2658HD	0.836795	0.81194	0.88563	0.667493	0.916974		0.711177	0.576119	0.97654	0.535773	0.945198
2694HD	0.922849	0.5	0.964169	0.495381	0.917982		0.909001	0.333333	0.965255	0.354401	0.845072
26K6E	0.807992	0.327434	0.94375	0.350983	0.799815		0.804094	0.300885	0.94625	0.329732	0.735705
2862E	0.784585	0.743017	0.793517	0.446156	0.791633		0.859684	0.340782	0.971188	0.429154	0.801119
28G9E	0.731707	0.12069	0.960052	0.149092	0.619532		0.749531	0.172414	0.965206	0.236574	0.63021
28H3E	0.626087	0.213235	0.773263	-0.0142721	0.529617		0.745894	0.0772059	0.984273	0.154021	0.636632
28H8E	0.682646	0.132353	0.876783	0.0121046	0.502558		0.740173	0.161765	0.944228	0.168306	0.466318
28K2E	0.759804	0.0995025	0.921856	0.0309052	0.502964		0.804902	0.228856	0.946276	0.245608	0.557557
28K3E	0.653697	0.219718	0.882615	0.135263	0.680284		0.650778	0.0591549	0.962853	0.0506132	0.564586
28K4E	0.79353	0.323383	0.904706	0.259365	0.777749		0.814462	0.263682	0.944706	0.279312	0.686462
28K7E	0.755142	0.288538	0.908854	0.245558	0.653427		0.763957	0.126482	0.973958	0.197236	0.695446
28L7E	0.651751	0.154386	0.84253	-0.00379817	0.542736		0.684825	0.0350877	0.934051	-0.0593938	0.499514
28L8E	0.723247	0.189349	0.965147	0.259377	0.621177		0.714022	0.14497	0.97185	0.22018	0.569241
28M1E	0.687262	0.34058	0.810567	0.158221	0.614887		0.769962	0.181159	0.979381	0.291246	0.665798
NW0002	0.760314	0.866029	0.733004	0.496086	0.873797		0.852652	0.511962	0.940667	0.508884	0.857548
NW0005	0.961111	0.463768	0.995054	0.616882	0.799445		0.951852	0.376812	0.991098	0.5081	0.774115
NW0008	0.914099	0.869048	0.917933	0.603	0.9656		0.945845	0.857143	0.953394	0.695959	0.975045
NW0009	0.943525	0.105263	0.992784	0.200801	0.836851		0.946446	0.245614	0.987629	0.33996	0.827907
NW0019	0.766145	0.4	0.944687	0.432466	0.856638		0.777887	0.38209	0.970888	0.470827	0.886287
NW0020	0.935361	0.512195	0.952522	0.363291	0.889484		0.961977	0.512195	0.980218	0.492413	0.81717
NW0022	0.917154	0.376471	0.965994	0.390339	0.864312		0.893762	0.223529	0.954304	0.205723	0.808995
NW0023	0.878143	0.20979	0.98541	0.337532	0.849623		0.834623	0.405594	0.903479	0.308172	0.859555
NW0026	0.951172	0.3	0.977642	0.300231	0.848336		0.946289	0.275	0.973577	0.258065	0.809375
NW0027	0.916747	0.307018	0.992383	0.475008	0.903786		0.916747	0.368421	0.984766	0.488735	0.789631
NW0032	0.911597	0.863636	0.938053	0.80618	0.95677		0.875475	0.708556	0.967552	0.726599	0.959244
NW0037	0.889197	0.413043	0.986652	0.54937	0.844595		0.882733	0.478261	0.965517	0.532896	0.909924
NW0053	0.921381	0.772727	0.927928	0.466112	0.927985		0.973154	0.727273	0.983984	0.682344	0.89866
NW0054	0.949281	0.764151	0.989701	0.820208	0.954555		0.942519	0.707547	0.993821	0.795016	0.943182
NW0058	0.874517	0.651515	0.90708	0.502903	0.915426		0.903475	0.575758	0.951327	0.549178	0.916038
NW0063	0.956689	0.421053	0.977023	0.393135	0.766668		0.919153	0.236842	0.945055	0.142018	0.729757
NW0065	0.950787	0.75	0.957317	0.501248	0.959762		0.944882	0.71875	0.952236	0.462691	0.91338
Average:	0.850674	0.451163	0.930215	0.403145	0.811257		0.857441	0.408214	0.957143	0.406751	0.799697

[truncated: 7 more sheets: Table S11, Table S12, Table S13, Table S14, Table S15, Table S16, Table S17]
